# Supplementary material for: Effect of Combination Treatment With Varenicline and Nicotine Patch on Smoking Cessation Among Smokers Who Drink Heavily: A Randomized Clinical Trial
Source: PubMed Central journal article supplement (PMC8897753; doi:10.1001/jamanetworkopen.2022.0951), 2022-03-04
Supplement: jamanetwopen-e220951-s001.pdf [file jamanetwopen-e220951-s001.pdf]

## Supplemental Trial Protocol, Statistical Analysis Plan, and Summary of Protocol Changes for

*Effect of Combination Treatment with Varenicline and Nicotine Patch on Smoking Cessation Among Heavy Drinking Smokers: A Randomized Clinical Trial*

- I. Original Protocol at Trial Initiation, page 1
- II. Summary of Changes to the Protocol, page 14

### I. Original Protocol at Trial Initiation

**Title of Research Project:** Varenicline Augmentation of Patch Outcomes in Heavy Drinkers' Smoking Cessation

**Principal Investigator:** Andrea King, Ph.D.

**Date:** 12/1/2015

**Targeted Enrollment:** The targeted enrollment for this protocol is 120 heavy drinking smokers.

#### Detailed Protocol Narrative:

##### 1. Background

Tobacco and alcohol use are two of the top three leading causes of preventable disease worldwide, contributing to nearly seven million deaths each year<sup>1-3</sup>. Co-use of these substances is widely prevalent<sup>4-8</sup> and associated with numerous medical problems including cancers, pulmonary, and cardiovascular disease with synergistic mortality increases from esophageal, laryngeal, and oral cancers beyond the risks of each substance individually<sup>9-11</sup>. No treatments have been targeted to improve quit rates for heavy drinking smokers (HDS) but such treatments may be most effective if they affect both smoking and drinking behaviors and underlying aspects of inhibitory control and impulsivity<sup>12-14</sup>. Thus, there is a crucial need to understand the mechanisms of action of promising treatments in order to reduce the health burden of alcohol-smoking comorbidity. Our increasing knowledge about the neurocircuitry and behavioral pharmacology of alcohol and nicotine suggest that the neuronal nicotinic acetylcholine receptors (nAChRs) may be strong candidate targets in HDS to augment nicotine agonist treatment which reduces tobacco withdrawal producing modest but meaningful improvements in quit rates versus "cold turkey" unassisted quit attempts.

VAR tartrate (VAR) is a partial agonist at nAChRs that is particularly selective for the  $\alpha 2\beta 4$  subunit subtype thought to mediate withdrawal and smoking reward<sup>15-17</sup>. VAR is approved for nicotine dependence in general adult smokers with quit rates at 12 weeks at 44% vs. 18% for placebo, reduced to 23% and 10%, respectively at 52 weeks<sup>18</sup>. Quit rates are higher when VAR is combined with nicotine patch than with VAR alone (odds ratio, 2.13 at 6 months)<sup>19</sup>. The mechanism of action may involve partial nicotine agonist effects to relieve negative affect and smoking urge<sup>15,20, 51</sup> as well as improve working memory<sup>21,22</sup> and inhibitory control<sup>23</sup>.

We have shown that VAR improves alcohol's impairment of visual processing<sup>24</sup> without adverse effects on cardiovascular function<sup>25,26</sup>. VAR may also reduce urge to smoke<sup>27-30</sup> with quit rates increasing over the first few weeks of treatment unlike other medications that show declining quit rates over time<sup>18</sup>. HDS have been largely excluded in these aforementioned studies<sup>31</sup>, leaving health care providers unsure of clinical approaches other than relying on the standard protocol of patch and counselling. However, this approach is less effective in HDS, as our research shows 14% quit rates in HDS compared with 24-32% in light and non-drinkers, respectively<sup>32</sup>. Another pharmacotherapy, naltrexone, augmented patch and counselling outcomes in HDS to 32% quit rates, higher than the 10-25% observed in non- and light-drinkers. Naltrexone is not approved for smoking cessation and so its use may be limited only to an off-

52 label purpose. However, VAR is approved for smoking cessation and given the complexity of smoking-  
 53 alcohol interactions, VAR may be a more amenable choice for providers to augment standard treatment of  
 54 patch and counselling in HDS. The rationale behind this is that VAR may increase negative-like alcohol  
 55 responses and decrease drinking behaviors<sup>24, 33-36</sup> and its effects on alcohol sedation and intoxication are  
 56 now included as a warning label. Concerns about VAR side effects and such warnings have unduly  
 57 limited its use in some contexts, and in particular, for HDS. Unfortunately, data are lacking in a real-  
 58 world context on the effectiveness of a comprehensive strategy to address smoking quit rates and decrease  
 59 alcohol behaviours, even in patients for whom the goal of reducing or quitting drinking is not explicitly  
 60 stated.

61  
 62 Thus, we propose to provide real-world effectiveness data on VAR as an augmentation strategy for patch  
 63 and counselling. We feel that this comprehensive strategy of VAR and patch may be most helpful in  
 64 HDS as they are historically difficult to treat and may be more amenable to VAR in the context of  
 65 augmenting patch and brief counselling effects, as quit rates are higher with this combination than with  
 66 VAR alone.<sup>19</sup>

67

## 68 **2. Purpose or Hypothesis**

69 In the proposed research, we will conduct a real-world clinic-based smoking cessation study to examine  
 70 the augmentation strategy of VAR and patch versus standard treatment of patch only in HDS. VAR is  
 71 approved for smoking cessation, but not routinely given in practice for HDS patients in general due to  
 72 concerns about recent warnings about drinking, particularly in patients who are not yet ready to abstain  
 73 from drinking. Providers are reluctant to prescribe bupropion due to seizure threshold concerns, thereby  
 74 leaving patch and other forms of NRT as the main medication options. Patch is the easiest and most  
 75 widely accepted of NRT strategies but data in HDS show that they are not as responsive to this standard  
 76 treatment as their light and non-drinking smoker counterparts.

77

78 In this proposal, all participants will receive brief clinic counselling designed to bolster and motivate use  
 79 of online self-help materials. The only exclusion criteria will be major uncontrolled medical or psychiatric  
 80 conditions for which use of the nicotine patch or VAR are contraindicated. We will ascertain smoking  
 81 urge and withdrawal, negative affect, neurocognition, and alcohol and smoking behaviors at pre-quit  
 82 baseline, 2 and 12 weeks post quit date, and again at 26-week follow-up, i.e., 12 weeks after medication  
 83 discontinuation.

84

85 *Our goal is to examine:*

### 86 **1). Whether VAR improve smoking and drinking outcomes in HDS.**

87 *Primary prediction:* VAR will improve quit rates relative to patch treatment.

88 *Secondary prediction:* VAR will reduce alcohol drinking behaviours (drinks per week, % heavy drinking  
 89 days) relative to patch treatment.

90

### 91 **2). Whether VAR will decrease smoking urge, tobacco withdrawal, negative affect, and 92 neurocognition in HDS.**

93 *Secondary Predictions:* VAR will improve tobacco urge, withdrawal symptoms, affect, and cognition  
 94 relative to patch treatment.

95

96 **3). (Exploratory aim) Whether there are individual differences that predict better treatment  
 97 response with VAR. Participant characteristics and behavioural factors (age, sex, medication  
 98 adherence, affect, urge, alcohol, and smoking) will be examined in multivariate analyses to identify  
 99 predictors of treatment response (quit rates, drinking).**

100

101 ***Overall impact:*** This investigation has the potential to identify a potentially viable option for smoking  
102 cessation in HDS that can be implemented in practice. The study will also determine who is most likely to  
103 benefit from VAR in this real-world context.

104

### 105 **3. Protocol Methodology**

106 Participants will be enrolled on a continuous basis. There will be 4 total in-person study visits over the  
107 trial (pre-quit, quit date, week 2 and week 12), aligned with clinical practice, ending 12 weeks after the  
108 quit date. Biochemical verification from breath tests for CO, as well as vital signs and weight, will be  
109 measured at each visit along with survey responses. These will also be used at a 26-week follow-up by  
110 telephone with biochemical verification for CO in those reporting being smoke-free.

111

#### 112 Screening and Randomization

113 Participants will respond to advertisements and will undergo a brief phone screening to determine initial  
114 eligibility requirements. Qualified candidates will be invited into the lab to conduct a short screening and  
115 study information session at the Clinical Addictions Research Laboratory at the University of Chicago.  
116 At screening, participants will sign an informed consent document. Next, demographics, smoking,  
117 alcohol and substance use patterns, health history, medications, vital signs, a urine test (for pregnancy  
118 and/or drug toxicology), and a blood test will be obtained by the study nurse. Specifically, we will  
119 administer the Timeline Followback (TLFB)<sup>39</sup> for past month smoking and drinking, the Alcohol  
120 Dependence Scale<sup>40</sup> the Fagerstrom Test of Nicotine Dependence<sup>41</sup>, the Smoking Stages Ladder  
121 Questionnaire to discern desire to quit smoking, and the Shipley Institute of Living Scale<sup>42</sup> (for estimated  
122 verbal ability and IQ).

123

124 Eligible participants will be randomized into one of two treatment groups: Standard Treatment (n=60)  
125 will proceed with the study receiving nicotine patches and brief counseling sessions; Augmented  
126 Treatment (n=60) will proceed with the same nicotine patches and brief counseling sessions, but will also  
127 receive standard dosing of Varenicline tartrate (VAR).

128

#### 129 Nicotine Patches

130 Nicotine patches will be utilized starting at study quit date (Study Week 0), and proceed according to  
131 package insert directions (10+ cigs/day smokers will begin with 21mg patches for six weeks, followed by  
132 14mg patches for four weeks, and finally 7mg patches for two weeks. Those smoking fewer than 10  
133 cigarettes/day will follow the same process starting at the 14mg patch level.

134

#### 135 Varenicline Tartrate

136 Those in the VAR group will receive varenicline in this effectiveness study. They will undergo an up-  
137 titration week prior to the quit date, 12 weeks of target dosing, and a down-titration week. As per Pfizer  
138 recommendations, up-titration will be 0.5mg tablets once daily for 3 days followed by twice daily for four  
139 days leading to the quit date on day 8. We will reverse this sequence for a down-titration week on week  
140 13, which we have found in prior studies helps with patient expectancy and concerns about abrupt  
141 medication discontinuation, therefore, 22 doses of 0.5 mg per participant. Target dosing will be at the  
142 approved dose of 1mg twice daily for 12 weeks, therefore, 168 doses of 1.0 mg per participant.

143

#### 144 Study Visits and Brief Counseling Sessions

145 Participants will have the choice to complete study visits at either the Clinical Addictions Research  
146 Laboratory (CARL) at the University of Chicago or at the Respiratory Health Association (RHA) in the  
147 Chicago Loop area.

148

149 Smoking Cessation Behavioral Sessions: Participants will attend one-on-one behavioral counseling  
150 sessions with a trained Masters or PhD. Level therapist at each study visit. Behavioral sessions will

151 involve teaching behavioral skills to assist with smoking cessation, preventing relapse, and coping with  
152 physical or emotional changes associated with cravings.

153  
154 Subjective Measures: At each visit, brief self-report surveys (~10 minutes) will be given, as often used in  
155 routine practice in the smoking clinic for safety checks and monitoring of progress. These include the  
156 TLFB for daily estimates of cigarettes, alcohol drinks, as well as other forms of tobacco, cannabis or  
157 electronic cigarettes, if appropriate, because use of these substances and devices have been increasing and  
158 may affect treatment outcomes); the 10-item B-QSU<sup>43</sup> for smoking urge assessment; the 8-item Alcohol  
159 Urge Questionnaire<sup>44</sup>; the 8-item Minnesota Nicotine Withdrawal Scale<sup>45</sup>, the Beck Depression Inventory  
160 for current depressive symptoms, and the State-Trait Anxiety Inventory to measure current anxiety. For  
161 participants who reported having smoked, a cigarette evaluation scale will be given to assess reward,  
162 pleasure, and other sensations of smoking. Safety checks will include the Clinical Institute Withdrawal  
163 Assessment (CIWA-Ar)<sup>46</sup>, the Columbia Suicide Severity Rating Scale, and the adverse effects checklist  
164 consistent with the symptoms reported in the Physician's Desk Reference for VAR and nicotine patch.

165  
166 Objective: At each visit, noninvasive objective measures will be conducted. These include carbon  
167 monoxide (CO) expired air breath tests (Smokerlyzer®) to verify nonsmoking self-report; breath alcohol  
168 content (Alco-Sensor III), vital signs (Dinamap® ProCare Monitor, Waukesha, WI), and weight (Tanita  
169 digital scale).

170  
171 Neurocognitive: At baseline and again at the 2- and 12-week study visits, participants will complete a  
172 computerized neurocognitive test battery (~15 minutes) assessing select domains of executive functioning  
173 implicated previously in the pathogenesis and maintenance of addiction. Cognitive flexibility will be  
174 measured using the Wisconsin Card Sorting Task<sup>47</sup>; response inhibition will be measured using the Stop  
175 Signal Task<sup>48</sup>; and working memory capacity will be assessed using the N-Back task<sup>49</sup>. Task order will be  
176 counterbalanced across groups.

177  
178 Follow-Up Interview (Week 26)

179 At Study Week 26, participants will complete a follow-up telephone interview, completing similar  
180 subjective measures as those completed during study visits. Participants reporting being smoke-free  
181 during this interview will arrange for biochemical verification of this status via expired CO testing either  
182 by arranging for a time to stop into one of the study sites or by arranging for study staff to meet with them  
183 in their home or workplace.

184

185

### Study Measures and Tasks

| Measure/Task Name                                       | Screening/<br>Study<br>Info<br>Session | Study Visits               |                           |                    |                  | Follow-Up        |
|---------------------------------------------------------|----------------------------------------|----------------------------|---------------------------|--------------------|------------------|------------------|
|                                                         |                                        | Pre-<br>Quit<br>Week<br>-1 | Quit<br>Date<br>Week<br>0 | Study<br>Week<br>2 | Study<br>Week 12 | Study<br>Week 26 |
| Demographics Questionnaire                              | X                                      |                            |                           |                    |                  |                  |
| Substance Use Questionnaire                             | X                                      |                            |                           |                    |                  |                  |
| Health History Questionnaire                            | X                                      |                            |                           |                    |                  |                  |
| Alcohol Dependence Scale <sup>40</sup>                  | X                                      |                            |                           |                    |                  |                  |
| Fagerstrom Test of Nicotine<br>Dependence <sup>41</sup> | X                                      |                            |                           |                    |                  |                  |
| Shipley Institute of Living<br>Scale <sup>42</sup>      | X                                      |                            |                           |                    |                  |                  |
| Smoking Stages Ladder                                   | X                                      |                            |                           |                    |                  |                  |

|                                                       |   |   |   |   |   |   |
|-------------------------------------------------------|---|---|---|---|---|---|
| Questionnaire                                         |   |   |   |   |   |   |
| DSM-5/ICD-10                                          | X |   |   |   |   |   |
| Blood Test (Hepatic Panel)                            | X |   |   |   |   |   |
| Physical Exam                                         | X |   |   |   |   |   |
| Vital Signs                                           | X | X | X | X | X |   |
| Weight                                                | X | X | X | X | X |   |
| Carbon Monoxide (CO)                                  | X | X | X | X | X | X |
| Breath Alcohol Content (BrAC)                         | X | X | X | X | X |   |
| Urine Toxicology and<br>Pregnancy Testing             | X |   |   |   |   |   |
| TLFB <sup>39</sup>                                    | X | X | X | X | X | X |
| Beck Depression Inventory                             | X | X | X | X | X | X |
| State-Trait Anxiety Inventory                         | X | X | X | X | X | X |
| BQSU <sup>43</sup>                                    |   | X | X | X | X | X |
| Alcohol Urge Questionnaire<br>(AUQ) <sup>44</sup>     |   | X | X | X | X | X |
| Minnesota Nicotine Withdrawal<br>Scale <sup>45</sup>  |   | X | X | X | X | X |
| Clinical Institute Withdrawal<br>Assessment (CIWA-AR) |   | X | X | X | X | X |
| Columbia Suicide Severity<br>Rating Scale             |   | X | X | X | X | X |
| Adverse Events Checklist                              |   | X | X | X | X | X |
| Wisconsin Card Sorting Task <sup>47</sup>             |   | X |   | X | X |   |
| Stop Signal Task <sup>48</sup>                        |   | X |   | X | X |   |
| N-Back Task <sup>49</sup>                             |   | X |   | X | X |   |

186

187

**4. Probable Duration of Protocol**

189 Study activities are expected to last approximately 1 year from protocol initiation, enrolling  
190 approximately 10-15 participants per month into the trial.

191

**5. Location of Research**

193 At the University of Chicago, study activities will be conducted within the Clinical Addictions Research  
194 Laboratory (Billings Hospital, Rm M360). Additional visits will have the option of being conducted at  
195 the Respiratory Health Association (RHA; 1440 W Washington Blvd, Chicago, IL 60607). Both facilities  
196 are within 8 miles in Chicago IL and have clinic stop-smoking programs in place. They have partnered  
197 before for smoking cessation trials and can facilitate the proposed study by conducting effectiveness work  
198 within their smoking cessation clients to screen for current alcohol drinkers and meet enrollment  
199 estimates of 120 completed participants in a one-year study. They are complimentary service-oriented  
200 programs with approximately 500-800 square feet of available space and several offices and participant  
201 interview rooms.

202

**6. Special Precautions**

204 When signing informed consent, subjects will be informed that they can withdraw at any time from the  
205 study, for whatever reason, without prejudice. All data specifically obtained for research will be kept  
206 strictly confidential. Raw self-report data will be kept in a locked file cabinet, while data stored in the  
207 password protected computer database will identify subjects only by subject number and not by  
208 individual name. Access to identifying data will be limited to research staff engaged in the project. As  
209 part of the consent procedure, subjects will be advised of precautions taken to preserve confidentiality.

210

211 There will be three levels of protection for participants against the risk of medication and patches:

212 a) Screening and Consent: As detailed above, participants will be carefully screened via history and  
213 laboratory testing in order to eliminate those persons with elevated risks of taking nicotine patch214 or varenicline. This screen will exclude persons with a history of past adverse reactions to drug,  
215 pregnancy, lactation, current substance dependence, history of hepatic dysfunction or active216 cardiovascular disease, or medical conditions associated with an increased risk of adverse events.  
217

217

218 b) Monitoring: During active medication treatment, participants will be monitored for adverse  
219 reactions to medications. Participants will be advised to report adverse reactions immediately and  
220 given two 24-hour contact lists:

221 • For emergencies: the Study Physician and the PI phone numbers and pagers

222 • For general information: the Project Coordinator's phone numbers  
223

223

224 c) Adverse Event Reporting: Subjects will complete side effects checklists. Participants reporting  
225 side effects will be evaluated by the study physician. The study physician may order appropriate  
226 laboratory tests to follow up on side effects or adverse events.  
227

227

228 **7. Description of Experimental Controls and Use of Placebos**229 The protocol will be an effectiveness trial and, thus, will be addressing the effect of adding varenicline to  
230 standard patch treatment in heavy drinking smokers under "real world" clinical settings. Main dependent  
231 variables will be compared between those in the standard treatment and augmented treatment to discern  
232 success.  
233

233

234 **8. Type and Number of Experimental Subjects**235 N=120 heavy drinking smokers (HDS) randomized into one of two treatment conditions: 1) Standard  
236 treatment of nicotine patches and brief counseling sessions [n=60]; or 2) Augmented treatment of nicotine  
237 patch, brief counseling sessions, and varenicline. Based on previous enrollment and retention efforts, it is  
238 estimated that n=180 participants will need to be enrolled (i.e. sign a consent) in order to reach the n=120  
239 goal, allowing for n=60 participants to be deemed ineligible during screening or to drop out or be  
240 removed from the study during the smoking cessation trial.  
241

241

242 Method of subject selection243 Participants who respond to advertisements (via the internet, local agencies, smoking clinics, medical and  
244 dental offices, and in the public transportation system) will undergo a short screening and study  
245 information session, with the goal for an intent-to-treat sample of N=120 (n=60/group) who attend the  
246 first clinic visit. For eligibility, we will only consider daily smokers with a range of 3-30 cigs/day with  
247 drinking levels consistent with the NIAAA hazardous drinking guidelines [>4 drinks in a day for men  
248 (>3 for women) and >14 drinks weekly for men (>7 drinks weekly for women)]<sup>37,38</sup>. Alcohol and tobacco  
249 use disorder diagnoses (DSM-5/ICD-10) will be recorded but will be neither necessary nor sufficient for  
250 inclusion. Participants with any major medical or psychiatric contraindications, including severe  
251 withdrawal symptoms and history of seizures and DTs when stopping drinking, will be referred to  
252 appropriate treatment. Those currently in mild/moderate alcohol withdrawal but without severe  
253 complications will be referred to detoxification before being ascertained for study enrollment. We  
254 anticipate recruiting 30-35% women and 30-35% racial minorities in the study similar to our prior studies  
255 and reflective of the demographics of HDS.  
256

256

257 Randomization258 A computer number generator will determine randomization into either the Patch+Counseling or  
259 VAR+Patch+Counseling groups, stratified by:

260 ○ Sex (Male or Female)

- 261           ○ Smoking (lighter: 3-14 cigs/day; heavier: 15-30 cigs/day)

262

263 Inclusion/Exclusion Criteria: These are used for safety and ethical reasons for study medications and to  
264 define broad study sample characteristics for an effectiveness-based study:

- 265       • Age 18-75 years of age
- 266       • Smoke 3-30 cigarettes/day
- 267       • Desire to quit smoking as indicated on a smoking stages ladder
- 268       • Consume >14 (men) or >7 (women) standard alcohol drinks per week (e.g., 1 drink = 12 oz beer,  
269       5 oz wine, 1.5 oz liquor)
- 270       • Not having hepatic panel indices > 2 SD, history of seizures or DTs during alcohol withdrawal, or  
271       an unstable medical (e.g., hepatitis, cirrhosis, seizure disorder, recent major cardiovascular event,  
272       etc.) or psychiatric disorder (e.g., active hallucinations, severe depression, obsessional thinking,  
273       self-injury risking significant blood loss, etc.) deemed by the study physician to be at significant  
274       risk for adverse interactions with study medications or measures.
- 275       • No history of adverse reactions to varenicline (VAR) or nicotine patch.
- 276       • No current suicidal ideation (past 6 months) and no history of major suicide attempts.
- 277       • For women of child-bearing potential, not currently pregnant or lactating, and does not have plans  
278       to become pregnant in next three months, and able to agree to adequate birth control during study  
279       participation.
- 280       • Ability to understand, read, and write in English, at least 8th grade education
- 281       • Willing and able to sign an informed consent
- 282       • Stable residence and contact information.

283

## 284 **9. Statistical Analysis**

285 Sample size calculations were derived from data obtained from several studies examining varenicline on  
286 smoking and drinking outcomes and our past community-based smoking cessation intervention study.  
287 Varenicline's effect was obtained from prior research on quit rates<sup>50</sup>, smoking urge<sup>23</sup>, and cognitive  
288 functioning<sup>22-23</sup>. For the proposed sample size (N = 60 per group), the power to detect a significant  
289 medication effect in the main outcomes will be  $\geq 0.8$ , for one-sided tests with Type I error of 0.05.

290

291 Logistic regression will be used to compare quit rates between groups. In addition, survival analysis will  
292 be employed to examine time to relapse and generalized estimation equation (GEE) models with different  
293 link functions will be used for longitudinal variables (drinks per week, percent heavy drinking days,  
294 neurocognitive functioning, negative affect, tobacco urge, withdrawal), controlling for pre-treatment  
295 baseline measures.

296

## 297 **10. Potential Risks and Benefits**

298 Potential risks include:

- 299       • Possible side effects of varenicline (for those in the augmented treatment condition) which  
300       include:
  - 301           ○ *Most Common* - nausea, abnormal (e.g. vivid, unusual, or strange) dreams, constipation,  
302           flatulence, and vomiting
  - 303           ○ *Rare* - serious skin reactions, angioedema and hypersensitivity reactions, accidental injury,  
304           cardiovascular events, increased effects of alcohol, new or worsening seizures, neuropsychiatric  
305           events (i.e. depression, anxiety, suicidal ideation, suicide attempt)
- 306       • Possible side effects of Nicotine Patch which include:
  - 307           ○ *Most Common* – Skin irritation (i.e. redness, itching, swelling and rash)

- 309 ○ *Rare*- headaches, dizziness, sleep disturbance, drowsiness, tiredness, difficulty concentrating,  
 310 nausea, abdominal pain, breathing symptoms, pain in chest or left arm, high blood pressure, and  
 311 increased heart rate  
 312
- 313 ● Possible side effects of blood draws which include:
  - 314 ○ *Most Common* – discomfort, pain, redness, bruising, and swelling at draw site  
 315
  - 316 ● Possible side effects of questionnaires which include:
  - 317 ○ *Rare* – discomfort or mental stress for items assessing current mood or affect (i.e. “do you feel  
 318 down or sad?”) and items reporting on substance use and problems  
 319

320 Potential benefits include possible direct benefit from receiving comprehensive smoking cessation  
 321 treatment at no financial cost. Subjects will also receive medical assessment at no personal expense and  
 322 will be given appropriate referrals if medical problems are discovered. The health risks of continued  
 323 smoking and associated factors (i.e., concurrent heavy use of alcohol or recreational drugs, risk for fires  
 324 or accidents, and secondary harmful effects on their children) will also be reviewed.  
 325

### 326 **11. Monitoring of Safety**

327 During screening, study applicants will undergo a history, complete battery of medical laboratory tests  
 328 and physical exam to determine their eligibility and safety of their participation in this study. Study  
 329 applicants will be excluded if they have any major medication or psychiatric conditions that may  
 330 contraindicate their participation in this study. During the treatment phase of the study, participants will  
 331 be asked about adverse events at each clinic visit and vital signs will be obtained before administering the  
 332 study medication. Patients will not receive the medication if they report any signs or symptoms that may  
 333 contraindicate its administration. Participants will be referred for immediate evaluation by the study  
 334 physician. Participants will be provided with the contact information for both the study P.I. and physician  
 335 to report any adverse reactions between study visits.  
 336

337 All unanticipated problems and adverse events (AEs) occurring during the course of the study must be  
 338 collected, documented, and reported to the Principal Investigator. The occurrence of AEs will be assessed  
 339 at baseline and each clinic visit during the treatment phase of the study and again during the 26-week  
 340 follow-up. The PI and study physician will review the AE Forms weekly for events reported as new or  
 341 continuing. The study investigators will follow all AEs to the point of a satisfactory resolution. A study  
 342 participant may have their medication discontinued or may be withdrawn from the study if the medically  
 343 responsible investigator determines it is the best decision in order to protect the safety of a participant. All  
 344 AEs will be assessed and reported to the IRB (within the specified time or, in the case of internal fatal/life  
 345 threatening unanticipated events reported immediately), to the FDA, and to the study sponsor via an  
 346 Investigator Initiated Research Serious Adverse Event Form. The P.I., a licensed clinical psychologist,  
 347 and study physician will be available to provide necessary referrals for all events of a medical or  
 348 psychiatric nature.  
 349

### 350 **12. Payment**

351 Participants will not be paid to receive smoking cessation treatment, but will be provided with a small  
 352 stipend of \$60.00 for their time in completing surveys and study measures at the end of treatment (Study  
 353 Week 12). Only participants completing all measures and surveys through Week 12 will be paid the  
 354 entire stipend (in the form of a gift card), but pro-rated compensation (\$10/visit) will be made available  
 355 for those who drop out at points prior to the end of treatment. During visits, participants will receive  
 356 nicotine patches, brief counseling, and study medication (50% of sample) at no charge. Participants will  
 357 also receive travel reimbursement to and from their study visit in the form of public transit passes or  
 358 garage parking passes. During the follow-up interview (Week 26) a \$40.00 gift card follow-up incentive

359 will be provided for all participants completing their follow-up within 2 weeks of the initial due date.  
 360 Those completing after this date will be provided a pro-rated \$20.00 gift card.

361

### 362 **13. Procedures to Obtain and Record Informed Consent**

363 Subjects will read and sign the written consent form prior to study participation. Subjects will be asked if  
 364 they have any questions and will be encouraged to exchange their understanding of the study procedures  
 365 with the researcher. Consent forms will be kept in a separate locked file.

366

### 367 **14. Procedures to Maintain Confidentiality**

368 Subjects will be given a four-digit subject code and their name will not appear on any of their data  
 369 records. This information will be filed in a locked cabinet in the project coordinator's office. Only  
 370 research personnel will have access to this information.

371

### 372 **15. Bibliographic References**

- 373 1. Dawson, D. A. (2000). Drinking as a risk factor for sustained smoking. *Drug and Alcohol*  
 374 *Dependence*, 59, 235–249.
- 375 2. Mokdad AH, Marks JS, Stroup DF, Gerberding JL. Actual causes of death in the United  
 376 States, 2000. *JAMA*. 2004;291(10):1238-1245.
- 377 3. World Health Organization. 2010.  
 378 [http://www.who.int/nmh/publications/ncd\\_report\\_full\\_en.pdf](http://www.who.int/nmh/publications/ncd_report_full_en.pdf). Published Last Modified  
 379 Date|. Accessed Dated Accessed|.
- 380 4. DiFranza JR, Guerrera MP. Alcoholism and smoking. *J Stud Alcohol*. 1990;51(2):130-  
 381 135.
- 382 5. Dani JA, Harris RA. Nicotine addiction and comorbidity with alcohol abuse and mental  
 383 illness. *Nat Neurosci*. 2005;8(11):1465-1470.
- 384 6. Harrison EL, Desai RA, McKee SA. Nondaily smoking and alcohol use, hazardous  
 385 drinking, and alcohol diagnoses among young adults: findings from the NESARC.  
 386 *Alcohol Clin Exp Res*. 2008;32(12):2081-2087.
- 387 7. Hughes JR. Treatment of smoking cessation in smokers with past alcohol/drug problems.  
 388 *J Subst Abuse Treat*. 1993;10(2):181-187.
- 389 8. Kalman D, Morissette SB, George TP. Co-morbidity of smoking in patients with  
 390 psychiatric and substance use disorders. *Am J Addict*. 2005;14(2):106-123.
- 391 9. Negri E, La Vecchia C, Franceschi S, Tavani A. Attributable risk for oral cancer in  
 392 northern Italy. *Cancer Epidemiol Biomarkers Prev*. 1993;2(3):189-193.
- 393 10. Pelucchi C, Gallus S, Garavello W, Bosetti C, La Vecchia C. Cancer risk associated with  
 394 alcohol and tobacco use: focus on upper aero-digestive tract and liver. *Alcohol Res*  
 395 *Health*. 2006;29(3):193-198.
- 396 11. Prabhu A, Obi KO, Rubenstein JH. The synergistic effects of alcohol and tobacco  
 397 consumption on the risk of esophageal squamous cell carcinoma: a meta-analysis. *Am J*  
 398 *Gastroenterol*. 2014;109(6):822-827.
- 399 12. MacKillop J, Kahler CW. Delayed reward discounting predicts treatment response for  
 400 heavy drinkers receiving smoking cessation treatment. *Drug Alcohol Depend*.  
 401 2009;104(3):197-203.
- 402 13. MacKillop J, Amlung MT, Few LR, Ray LA, Sweet LH, Munafo MR. Delayed reward  
 403 discounting and addictive behavior: a meta-analysis. *Psychopharmacology (Berl)*.  
 404 2011;216(3):305-321.
- 405 14. Moallem NR, Ray LA. Dimensions of impulsivity among heavy drinkers, smokers, and  
 406 heavy drinking smokers: singular and combined effects. *Addict Behav*. 2012;37(7):871-  
 407 874.
- 408 15. Coe JW, Brooks PR, Vetelino MG, Wirtz MC, Arnold EP, Huang J, Sands SB, Davis TI,  
 409 Lebel LA, Fox CB, Shrikhande A, Heym JH, Schaeffer E, Rollema H, Lu Y, Mansbach

- 410 RS, Chambers LK, Rovetti CC, Schulz DW, Tingley FD, 3rd, O'Neill BT. Varenicline:  
411 an alpha4beta2 nicotinic receptor partial agonist for smoking cessation. *J Med Chem.*  
412 2005;48(10):3474-3477.
- 413 16. Perkins KA, Mercincavage M, Fonte CA, Lerman C. Varenicline's effects on acute  
414 smoking behavior and reward and their association with subsequent abstinence.  
415 *Psychopharmacology (Berl)*. 2010;210(1):45-51.
- 416 17. Tapper AR, McKinney SL, Nashmi R, Schwarz J, Deshpande P, Labarca C, Whiteaker P,  
417 Marks MJ, Collins AC, Lester HA. Nicotine activation of alpha4\* receptors: sufficient  
418 for reward, tolerance, and sensitization. *Science*. 2004;306(5698):1029-1032.
- 419 18. Jorenby DE, Hays JT, Rigotti NA, Azoulay S, Watsky EJ, Williams KE, Billing CB,  
420 Gong J, Reeves KR. Efficacy of varenicline, an alpha4beta2 nicotinic acetylcholine  
421 receptor partial agonist, vs placebo or sustained-release bupropion for smoking cessation:  
422 a randomized controlled trial. *Jama*. 2006;296(1):56-63.
- 423 19. Koegelenberg CF, Noor F, Bateman ED, van Zyl-Smit RN, Bruning A, O'Brien JA,  
424 Smith C, Abdool-Gaffar MS, Emanuel S, Esterhuizen TM, Irusen EM. Efficacy of  
425 varenicline combined with nicotine replacement therapy vs varenicline alone for smoking  
426 cessation: a randomized clinical trial. *Jama*. 2014;312(2):155-161.
- 427 20. Hays JT, Croghan IT, Schroeder DR, Ebbert JO, Hurt RD. Varenicline for tobacco  
428 dependence treatment in recovering alcohol-dependent smokers: an open-label pilot  
429 study. *J Subst Abuse Treat*. 2011;40(1):102-107.
- 430 21. Patterson F, Jepson C, Loughhead J, Perkins K, Strasser AA, Siegel S, Frey J, Gur R,  
431 Lerman C. Working memory deficits predict short-term smoking resumption following  
432 brief abstinence. *Drug Alcohol Depend*. 2010;106(1):61-64.
- 433 22. Patterson F, Jepson C, Strasser AA, Loughhead J, Perkins KA, Gur RC, Frey JM, Siegel S,  
434 Lerman C. Varenicline improves mood and cognition during smoking abstinence. *Biol*  
435 *Psychiatry*. 2009;65(2):144-149.
- 436 23. Austin AJ, Duka T, Rusted J, Jackson A. Effect of varenicline on aspects of inhibitory  
437 control in smokers. *Psychopharmacology (Berl)*. 2014;231(18):3771-3785.
- 438 24. Childs E, Roche DJ, King AC, de Wit H. Varenicline potentiates alcohol-induced  
439 negative subjective responses and offsets impaired eye movements. *Alcohol Clin Exp*  
440 *Res*. 2012;36(5):906-914.
- 441 25. Rollema H, Russ C, Lee TC, Hurst RS, Bertrand D. Functional Interactions of  
442 Varenicline and Nicotine With nAChR Subtypes Implicated in Cardiovascular Control.  
443 *Nicotine Tob Res*. 2014.
- 444 26. Singh S, Loke YK, Spangler JG, Furberg CD. Risk of serious adverse cardiovascular  
445 events associated with varenicline: a systematic review and meta-analysis. *Canadian*  
446 *Medical Association journal*. 2011;183(12):1359-1366.
- 447 27. Ferguson SG, Shiffman S. The relevance and treatment of cue-induced cravings in  
448 tobacco dependence. *J Subst Abuse Treat*. 2009;36(3):235-243.
- 449 28. Hitsman B, Hogarth L, Tseng LJ, Teige JC, Shadel WG, DiBenedetti DB, Danto S, Lee  
450 TC, Price LH, Niaura R. Dissociable effect of acute varenicline on tonic versus cue-  
451 provoked craving in non-treatment-motivated heavy smokers. *Drug Alcohol Depend*.  
452 2013;130(1-3):135-141.
- 453 29. Brandon TH, Drobles DJ, Unrod M, Heckman BW, Oliver JA, Roetzheim RC, Karver SB,  
454 Small BJ. Varenicline effects on craving, cue reactivity, and smoking reward.  
455 *Psychopharmacology (Berl)*. 2011;218(2):391-403.
- 456 30. Ray LA, Lunny K, Bujarski S, Moallem N, Krull JL, Miotto K. The effects of varenicline  
457 on stress-induced and cue-induced craving for cigarettes. *Drug Alcohol Depend*.  
458 2013;131(1-2):136-142.

- 459 31. Leeman RF, Huffman CJ, O'Malley SS. Alcohol history and smoking cessation in  
460 nicotine replacement therapy, bupropion sustained release and varenicline trials: a  
461 review. *Alcohol Alcohol*. 2007;42(3):196-206.
- 462 32. Fridberg DJ, Cao D, Grant JE, King AC. Naltrexone improves quit rates, attenuates  
463 smoking urge, and reduces alcohol use in heavy drinking smokers attempting to quit  
464 smoking. *Alcohol Clin Exp Res*. 2014;38(10):2622-2629.
- 465 33. Steensland P, Simms JA, Holgate J, Richards JK, Bartlett SE. Varenicline, an  
466 alpha4beta2 nicotinic acetylcholine receptor partial agonist, selectively decreases ethanol  
467 consumption and seeking. *Proc Natl Acad Sci U S A*. 2007;104(30):12518-12523.
- 468 34. Mitchell JM, Teague CH, Kayser AS, Bartlett SE, Fields HL. Varenicline decreases  
469 alcohol consumption in heavy-drinking smokers. *Psychopharmacology (Berl)*.  
470 2012;223(3):299-306.
- 471 35. Fucito LM, Toll BA, Wu R, Romano DM, Tek E, O'Malley SS. A preliminary  
472 investigation of varenicline for heavy drinking smokers. *Psychopharmacology (Berl)*.  
473 2011;215(4):655-663.
- 474 36. McKee SA, Harrison EL, O'Malley SS, Krishnan-Sarin S, Shi J, Tetrault JM, Picciotto  
475 MR, Petrakis IL, Estevez N, Balchunas E. Varenicline reduces alcohol self-  
476 administration in heavy-drinking smokers. *Biol Psychiatry*. 2009;66(2):185-190.
- 477 37. NIAAA. Helping patients who drink too much: A clinician's guide NIH Publication No.  
478 05-3769. Bethesda, MD: National Institutes of Health. 2005.
- 479 38. SAMHSA. National survey on drug use and health. Bethesda, MD: Office of Applied  
480 Studies. 2005.
- 481 39. Sobell LC, Sobell MB. Alcohol timeline follow-back users' manual. Toronto, Canada:  
482 Addiction Research Foundation; 1995.
- 483 40. Skinner, HA, Allen, BA. Alcohol dependence syndrome: Measurement and validation.  
484 *Journal of Abnormal Psychology*, 1982; 91(3): 199-209.
- 485 41. Heatherton TF, Kozlowski LT, Frecker RC, Fagerstrom KO. The Fagerstrom Test for  
486 Nicotine Dependence: a revision of the Fagerstrom Tolerance Questionnaire. *British*  
487 *Journal of Addiction*. 1991;86(9):1119-1127.
- 488 42. Zachary RA, Shipley, W. C. Shipley institute of living scale: Revised manual: WPS,  
489 Western Psychological Services 1986.
- 490 43. Cox LS, Tiffany ST, Christen AG. Evaluation of the brief questionnaire of smoking urges  
491 (QSU-brief) in laboratory and clinical settings. *Nicotine and Tobacco Research*  
492 2001;3(1):7-16.
- 493 44. Bohn MJ, Krahn DD, Staehler BA. Development and initial validation of a measure of  
494 drinking urges in abstinent alcoholics. *Alcohol Clin Exp Res*. 1995;19(3):600-606.
- 495 45. Hughes JR, Hatsukami D. Signs and symptoms of tobacco withdrawal. *Arch Gen*  
496 *Psychiatry*. 1986;43(3):289-294.
- 497 46. Sullivan JT, Sykora K, Schneiderman J, Naranjo CA, Sellers EM. Assessment of alcohol  
498 withdrawal: the revised clinical institute withdrawal assessment for alcohol scale (CIWA-  
499 Ar). *Br J Addict*. 1989;84(11):1353-1357.
- 500 47. Psychological Assessment Resources. Computerised Wisconsin Card Sort Task Version 4  
501 (WCST); 2003.
- 502 48. Logan GD. On the ability to inhibit thought and action: A user's guide to the stop signal  
503 paradigm. San Diego: Academic Press; 1994
- 504 49. Conway AR, Kane MJ, Bunting MF, Hambrick DZ, Wilhelm O, Engle RW. Working  
505 memory span tasks: A methodological review and user's guide. *Psychon Bull Rev*.  
506 2005;12(5):769-786.
- 507 50. Hajek P, McRobbie HJ, Myers KE, Stapleton J, Dhanji AR. Use of varenicline for 4  
508 weeks before quitting smoking: decrease in ad lib smoking and increase in smoking  
509 cessation rates. *Arch Intern Med*. 2011;171(8):770-777.

- 510 51. Liang K-Y, Zeger, S. L. Longitudinal data analysis using generalized linear models.  
511 Biometrika. 1986;73(1):13-22.
- 512 52. Asvat Y, Cao D, Africk JJ, Matthews A, King A. Feasibility and effectiveness of a  
513 community-based smoking cessation intervention in a racially diverse, urban smoker  
514 cohort. Am J Public Health. 2014;104 Suppl 4:S620-627.
- 515 53. King A, Sanchez-Johnsen L, Van Orman S, Cao D, Matthews A. A pilot community-  
516 based intensive smoking cessation intervention in African Americans: feasibility,  
517 acceptability and early outcome indicators. J Natl Med Assoc. 2008;100(2):208-217.
- 518 54. Matthews AK, Sanchez-Johnsen L, King A. Development of a culturally targeted  
519 smoking cessation intervention for african american smokers. J Community Health.  
520 2009;34(6):480-492.

## 521 **16. Description of Recruiting Methods**

523 Advertisements will be used to attract heavy drinking smokers for study participation. Advertisements  
524 will be placed online (i.e. Craig's List, Marketplace, Chicago Reader Online), in newspapers (i.e. Chicago  
525 Red Eye, Chicago Reader, Chicago Tribune), and via flyers posted in research areas (e.g. bulletin boards  
526 in Department of Psychiatry), pre-approved areas in the hospital, and pre-approved public areas (e.g.  
527 Laundry mats, medical or dental offices, smoking clinics, church bulletin boards, community centers,  
528 etc.) with expressed consent from both the IRB and business owner or operator. Patients at the University  
529 of Chicago will not be directly recruited through clinician or primary physicians.

530  
531 Applicants will contact the study to conduct a brief phone interview to assess initial eligibility (i.e. age,  
532 smoking status, availability, etc.). Research assistants associated with the study and trained on issues of  
533 confidentiality will conduct these phone interviews, scheduling those applicants who are eligible for an  
534 in-person screening and providing a list of alternate smoking cessation referrals to those who do not meet  
535 basic eligibility criteria.

536

## 537 **17. Description of How the Subject's Primary Physician Will be Notified**

538 Patients at the University of Chicago will not be directly recruited through clinician or primary physicians  
539 nor will study participation be conducted in concert with any ongoing medical treatment. Information  
540 will be conveyed to the study participant directly and s/he will be encouraged to discuss the information  
541 with their primary care physician. If the subject prefers and consents, the study physician will discuss  
542 pertinent issues with the subject's primary physician as necessary.

543

## 544 **18. Description of Anticipated Coordination**

545 The study P.I. will meet with the study physician on a weekly basis to discuss study progress, review  
546 adverse events, and to determine course of action on individual cases. A partnership with the Respiratory  
547 Health Association (RHA) has been established to rent and utilize space to conduct participant interviews,  
548 dispense medications, and provide brief counseling for the effectiveness trial. The P.I. will conduct  
549 meetings with RHA on a monthly basis to review study progress and to address scheduling issues as  
550 needed. As the RHA has no formal IRB, no formal review or administrative oversight will need to take  
551 place with this partnership.

552

## 553 **19. Pregnancy Testing**

554 All female candidates who qualify for the study after psychosocial screening will submit to a pregnancy  
555 test and must give written assurance of adequate birth control methods during study participation.

556

## 557 **20. Rationale for Excluding Women, Minorities, and/or Children from Participation**

558 Children under the age of 18 will not be included in the trial as smoking is illegal in children under 18 and  
559 use of nicotine replacement therapy has not been established in children. Women and minorities will be  
560 recruited without bias.



562 **II. Summary of Changes to the Protocol**

563

| <b>Protocol changes</b>                                                                                                                                  | <b>Approval date</b> |
|----------------------------------------------------------------------------------------------------------------------------------------------------------|----------------------|
| Added urinary NicAlert test to screening as bioverification of smoker status                                                                             | October 24, 2017     |
| Obtained approval for addition of placebo pill (identical in appearance to varenicline and provided by Pfizer) to the control (“standard treatment”) arm | November 23, 2017    |
| Updated advertising methods and materials                                                                                                                | February 6, 2018     |
| Added collection of urine samples at visits 3 and 4 for potential nicotine and nicotine metabolite assays                                                | March 7, 2018        |
| Updated recruitment methods and materials                                                                                                                | May 24, 2018         |
| Obtained approval to collect an additional whole blood sample at screening for storage for future genetic analyses                                       |                      |
| Obtained approval for an expanded age range for eligibility from 21 75 years to 21 85 years                                                              | January 21, 2020     |

564
