# Supplementary material for: Effect of Combination Treatment With Varenicline and Nicotine Patch on Smoking Cessation Among Smokers Who Drink Heavily: A Randomized Clinical Trial
Source: PubMed Central journal article supplement (PMC8897753; doi:10.1001/jamanetworkopen.2022.0951), 2022-03-04
Supplement: jamanetwopen-e220951-s003.pdf [file jamanetwopen-e220951-s003.pdf]

## Data Sharing Statement

King. Effect of Combination Treatment With Varenicline and Nicotine Patch on Smoking Cessation Among Smokers Who Drink Heavily. *JAMA Netw Open*. Published March 04, 2022. doi:10.1001/jamanetworkopen.2022.0951

### Data

**Data available:** Yes

**Data types:** Deidentified participant data

**How to access data:** [aking@bsd.uchicago.edu](mailto:aking@bsd.uchicago.edu)

**When available:** With publication

### Supporting Documents

**Document types:** Informed consent form

**How to access documents:** [aking@bsd.uchicago.edu](mailto:aking@bsd.uchicago.edu)

**When available:** With publication

### Additional Information

**Who can access the data:** researchers whose proposed use of the data has been approved

**Types of analyses:** for a specified purpose

**Mechanisms of data availability:** with a signed data access agreement

**Any additional restrictions:** none
